# Supplementary material for: Power generation from n-type NbCo 1− x Ni x Sn and p-type NbFe 1− x Mn x Sb ternary half-Heusler compounds: from materials development to module fabrication
Source: Royal Society of Chemistry journal article supplement (doi:10.1039/d4tc02174f), 2024-01-01
Supplement: d4tc02174f1.pdf [file d4tc02174f1.pdf]

Electronic supplementary information

## Power Generation from n-type NbCo<sub>1-x</sub>Ni<sub>x</sub>Sn and p-type NbFe<sub>1-x</sub>Mn<sub>x</sub>Sb Ternary Half-Heusler Compounds: From Materials Development to Module Fabrication

Piyawat Piyasin<sup>1,2</sup>, Supree Pinitsoontorn<sup>1,3\*</sup>, Philipp Sauerschnig<sup>2</sup>, Kazuki Imasato<sup>2</sup>,  
Michihiro Ohta<sup>2\*</sup>

<sup>1</sup>*Department of Physics, Faculty of Science, Khon Kaen University, Khon Kaen, Thailand*

<sup>2</sup>*Global Zero Emission Research Center, National Institute of Advanced Industrial Science and Technology (AIST), Tsukuba, Ibaraki, Japan*

<sup>3</sup>*Institute of Nanomaterials Research and Innovation for Energy (IN-RIE), Khon Kaen University, Khon Kaen, Thailand*

\*E-mail of the corresponding author: [psupree@kku.ac.th](mailto:psupree@kku.ac.th); [ohta.michihiro@aist.go.jp](mailto:ohta.michihiro@aist.go.jp)

**Table S1**

Relative densities %, maximum  $zT$ , and average  $zT$  for n-type NbCo<sub>1-x</sub>Ni<sub>x</sub>Sn and p-type NbFe<sub>1-x</sub>Mn<sub>x</sub>Sb samples.

| Sample                                        | Dopant amount | Relative densities % | Maximum $zT$    | Average $zT$ (323 K to 873 K) |
|-----------------------------------------------|---------------|----------------------|-----------------|-------------------------------|
| n-type NbCo <sub>1-x</sub> Ni <sub>x</sub> Sn | $x = 0$       | 98                   | 0.14 [at 873 K] | 0.06                          |
|                                               | $x = 0.04$    | 98                   | 0.23 [at 873 K] | 0.10                          |
|                                               | $x = 0.10$    | 98                   | 0.34 [at 873 K] | 0.18                          |
|                                               | $x = 0.14$    | 99                   | 0.41 [at 873 K] | 0.20                          |
| p-type NbFe <sub>1-x</sub> Mn <sub>x</sub> Sb | $x = 0$       | 99                   | 0.01 [at 723 K] | 0.01                          |
|                                               | $x = 0.04$    | 99                   | 0.14 [at 723 K] | 0.11                          |
|                                               | $x = 0.10$    | 99                   | 0.07 [at 773 K] | 0.06                          |
|                                               | $x = 0.14$    | 100                  | 0.06 [at 723 K] | 0.05                          |

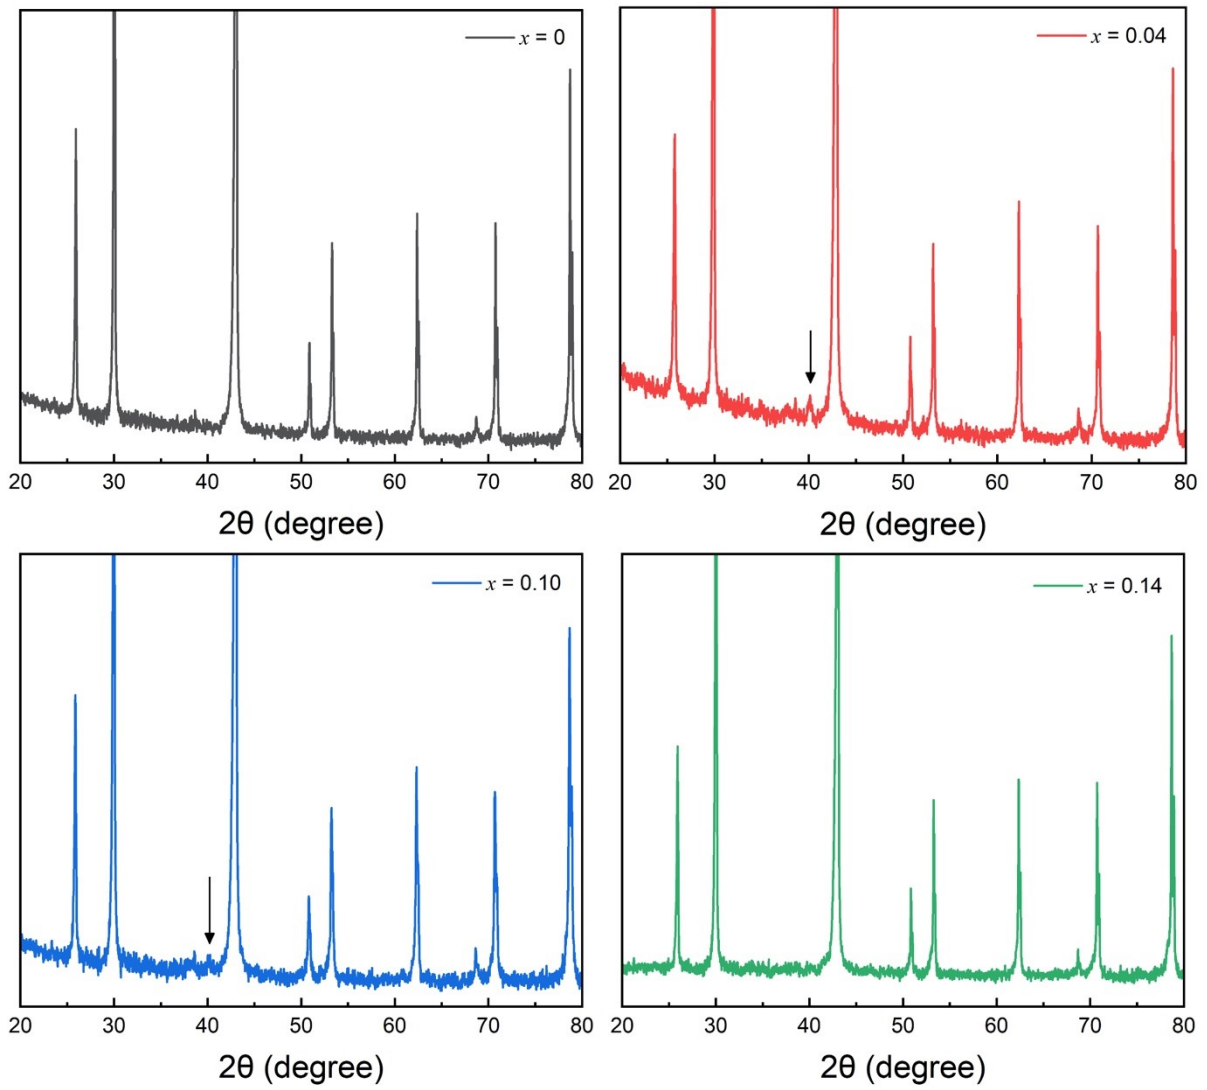

**Fig. S1**

Zoom-in X-ray diffraction pattern of  $n$ -type  $\text{NbCo}_{1-x}\text{Ni}_x\text{Sn}$  measured on the polished surfaces of sintered bulk specimens (**Fig. 1(a)**). The weak secondary phase is indicated by black arrow.

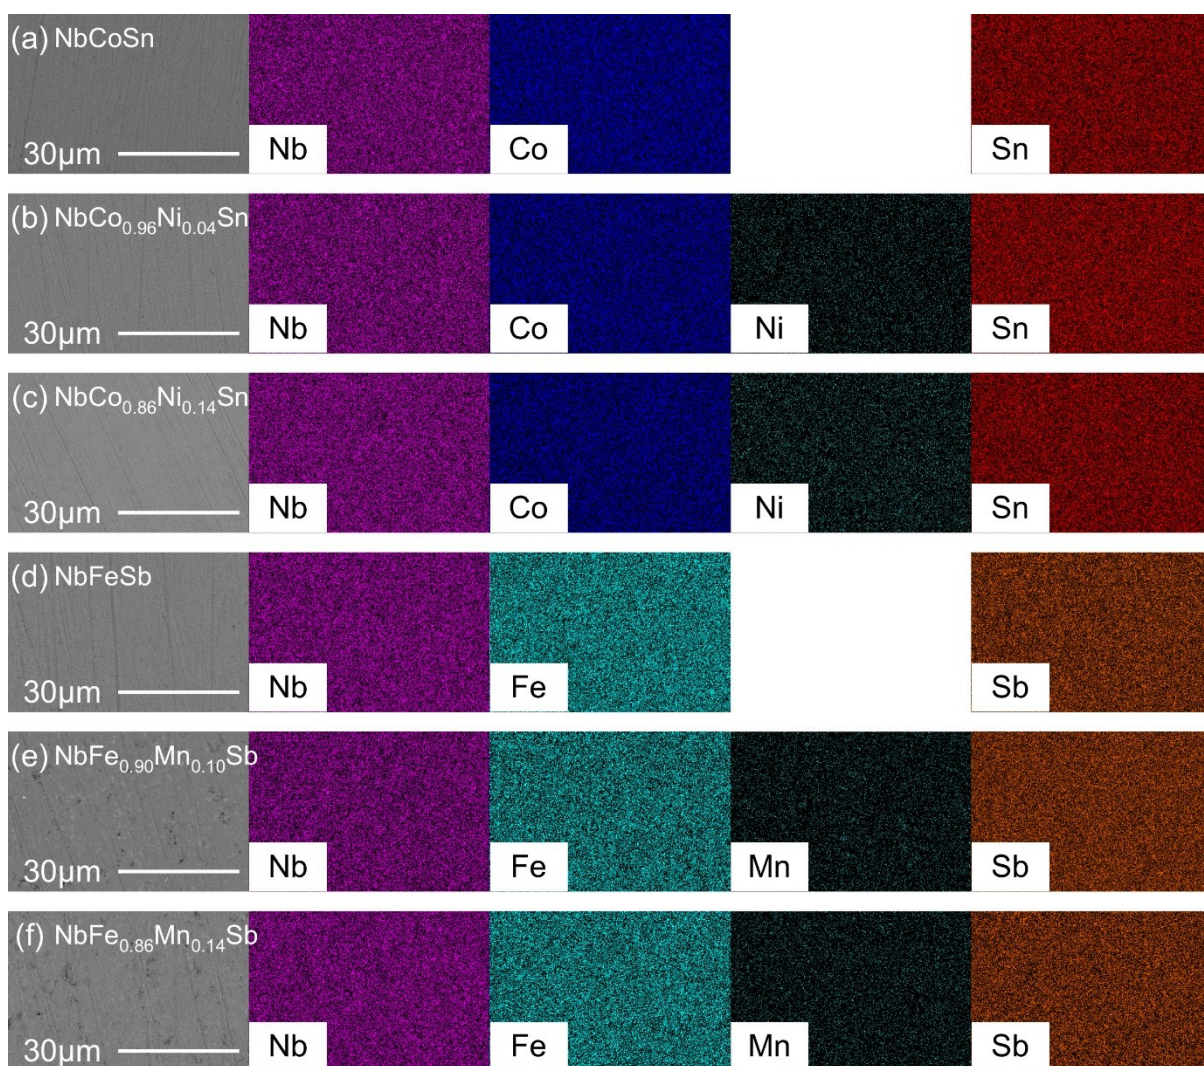

**Fig. S2**

Energy-dispersive X-ray spectroscopy (EDS) mapping and backscattered electron (BSE) images of (a) NbCoSn, (b) NbCo<sub>0.96</sub>Ni<sub>0.04</sub>Sn, (c) NbCo<sub>0.86</sub>Ni<sub>0.14</sub>Sn, (d) NbFeSb, (e) NbFe<sub>0.90</sub>Mn<sub>0.10</sub>Sb, (f) NbFe<sub>0.86</sub>Mn<sub>0.14</sub>Sb.

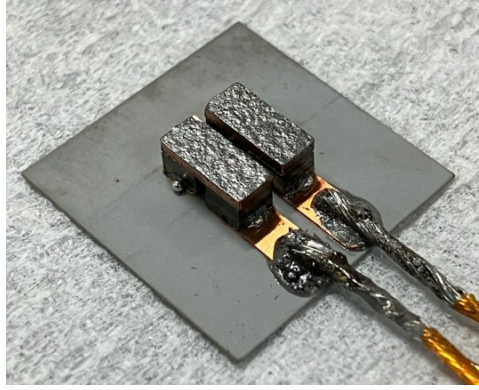

**Fig. S3**

$2\pi$ -module based on pair of  $n$ -type  $\text{NbCo}_{0.90}\text{Ni}_{0.10}\text{Sn}$  and  $p$ -type  $\text{NbFe}_{0.96}\text{Mn}_{0.04}\text{Sb}$ .  
 $20 \times 20 \text{ mm}^2$   $\text{Si}_3\text{N}_4$  ceramics substrate with height of 0.32 mm.

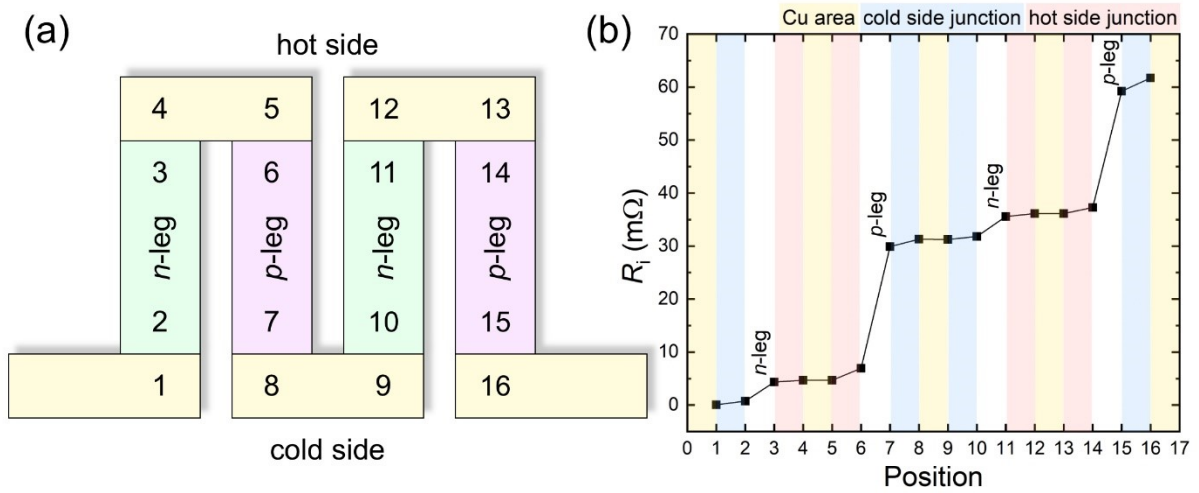

**Fig. S4**

(a) a schematic of the  $2\pi$ -module displaying the positions for resistance measurement, as shown in (b).

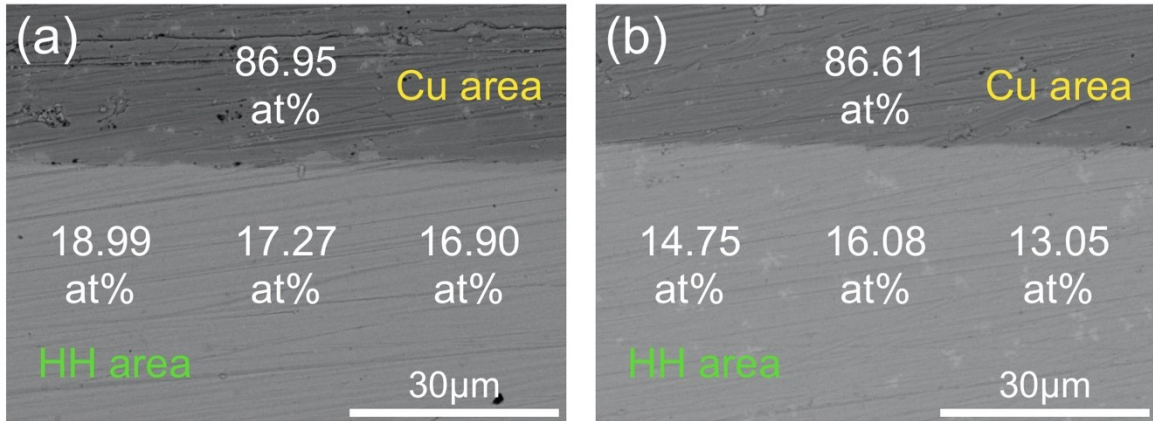

**Fig. S5**

Nominal atomic percentage of EDS mapping at Cu and (a)  $\text{NbCo}_{0.90}\text{Ni}_{0.10}\text{Sn}$ , and (d)  $\text{NbFe}_{0.96}\text{Mn}_{0.04}\text{Sb}$  junction. Atomic percentage of Cu is shown in backscattered electron (BSE) images at difference observed areas.

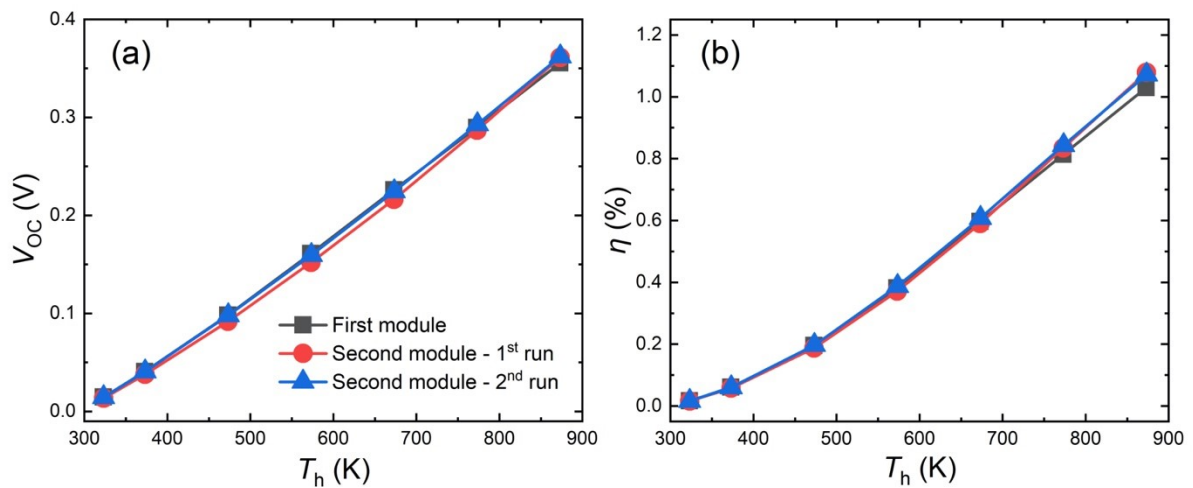

**Fig. S6**

The reproducibility of the  $2\pi$ -HH modules for (a) open-circuit voltage ( $V_{OC}$ ) and (b) maximum conversion efficiency ( $\eta_{max}$ ).
